# Supplementary material
Source: PubMed Central journal article supplement (PMC6958049)
Supplement: ijcep0011-0568-f7.pdf [file ijcep0011-0568-f7.pdf]

## Supplementary File 1. Plasmid sequencing results

### 1. M0827.0479-RIP3-RIP3\_C1R\_F09

TAAAGGAAAGGAAAGGGAAGGTATTAGATGAAGGGGGGGTCCAGAGATTTTTCCCTCTCTTGTCTCCCAGAAGATGCAGC  
AGCCTCAGCTTTTTGGAAGGTGTTATGGAGGACCAGAGGGAAGGTAAAGTCATTGAGAACTTAGCAGGAGATCTGAGTTG  
CTGATGGGCAGGCCTGAGATAAGTCAGCCGATCCCCTCGAGGGACCTAATAACTTCGTATAGCATACTATACGAAGT  
TATATTAAGGGTTATTGAATATGATCGGAATTGGGCTGCAGGAATTCGTCGACTGGGTCCGTGAGGGTGCATTAGGCCTG  
TGAACTGAGCCAGGGGGTTAAGAAGGGCGTCTGGTAAGGAGGGTCACTGGTATGACTAGAAAATAAACTCCTAGTTGG  
GTCTTGTCATGTGTGTAGTCTTGATTTCAGAGGGACAGGTAACAATGGTCCCAAGTCTACACTAGTTGTAGATGGA  
CTAACCTTGGCGTGGAGCTCTGGATCCAGCAGAATGTTAGAGGGCTTGAGGTCCCGTGCAGGAGCGGAGGGTTCAAGCT  
GTGTAGGTAGCACATCCCAGCACCCTTCTGCAGCAGGCGACAGAGAGTGGCCAGGGCCGAGGGCACTCGGGTTGCA  
GCAGCCCTGCGAGGGAGCCATTCTCCATGAATCTTGTCACCAGAGCCTGCCCGGACACGAAGTCCCACTGGAGTCTCA  
GTGACCCCGAGCAGGAGCAGAAGTCTCATTACGAAGATTAACCATAGCCTTACCTCCAGGATATCTTCTCCTACA  
CGCCGAAAGGGGGCCAAAATTGGATTGCGCTCTGGAAGACCCACCCTTGCCCACTCAGCTCGTGACCACACTCTGACT  
ACAGCTGGGGTCACTCACGAGTTCACGATCTTGACTGCTACATCATGTTCCATG

### 2. M0827.0480-RIP3-NEO\_R\_G09

CGCTCACTGGCAGCAGCGAGCTGCGGGGCGGGGGGACTTCTGACTAGGGGAGGAGTAGAAGGTGGCGGAAGGGGC  
CACCAAAGAACGGAGCCGGTTGGCGCTACCGGTGGATGTGGAATGTGTGCGAGGCCAGAGGCCACTTGTGTAGCGCCA  
GTGCCAGCGGGGCTGCTAAAGCGCATGCTCCAGACTGCCTTGGGAAAAGCGCCTCCCCTACCCGGTAGAATTCGACGA  
CCTGCAGCCAAGCTAGCTTGGCTGGACGTAACCTCCTTTCAGACCTGAAGTTCCTATACTTTCTAGAGAATAGGA  
CGGAATCTGCTGTTTGGGTGTCTTTGATGGGAGACCTTCTGGACTTGCTTATCAATAAAGGAAGTGTGGGGCTCACAG  
ACTCTGTGCTGGGAAAAGTCAGCCAATCCGACTTCTTTCGTTGTGTGACCTCAGTGGGATCCTCCTAGTGGATGTC  
ATGTTCTCGTCTTAAACGAGGCAGATCGGGTTAGATGATCTTAGTTCCTTCCCACCTCCAGAGTAACTCATGTC  
ATAGATAAGTGTGAGGAGGAAGGTGATGGGAGAGCTGAGCGGGGAGAGCAAGAGAGAATGAAGAATGGGTACCTGTCAT  
TGGATTCGGTGGGGTCCAGGGATACCAAGGAGTGCCGTGCTTCCATCTCCCTGCAAACAACACAGAGCTCTCAGGCTTT  
CTATTCAAGAGCCTAATCTCATCACCGTGCAGTTCCTCCTGGGTAAGAGGGTGTGCTCTAGTCTTGGCAGTGTCTCAC  
ATTCTTTGGGGGTGAGGACCGGGAGTCTCAGTAAAGACTGGCCAGGTGTTGTGCCTCTGAAGGGTAAAGTATGTGGAA  
TCTGAGGAGTGCCAGCCAGGGGTGAGAAGATGCTTGTGTTGGTGGCAGGCCCAACTGATGTGCTCTGTGCTTGCCTC  
TCAGGACATTTCCAGGAAGTGGTCCGGAGGGTTCCTCAAATGCA

### 3. M0827.0481-RIP3-NEO\_L\_H09

CCCAGCCTGGGGGTGCGGTGGGGCAGGAAGCAGGGGGAGGATTGGGAAGACAATAGCAGGCATGCTGGGGATGCGGTGGG  
CTCTATGGCTTCTGAGGCGGAAAGAACCAGCTGGGGCTCGACTAGAGCTTGCGGAACCCTTCGAAGTTCCTATTCTCTAG  
AAAGTATAGGAAGTTCATCAGTCAGGTACATAATAAATTCGTATAATGTATGCTATACGAAGTATTAGGTGGATCCC  
CCTCCACAGACTAAGACATCCCTAATGGAATGGGCTCAGGAGATGAATGGCACTACTCTTTGAGCTTCTACAAGACTAAT  
TCTGAAGAGGCACAGCTCATACTGGGACGCTAGCTAGCAGGTGAAGACCCTGCATTTGCATTCACCCAGGGAGATCACA  
AGGTGTCGCTGCCCTTTCCCAAAGTGTCTGCAACTTCATCTTTCTAACCTCTGAACCCTCTACCATCACCTCCTCC  
TTTCTCTTAAAGGGCCACCGGCTCTCGTCTTCAACAAGTGTCTGAAGTGCAGATTGGGAACTACAAGTCTTGGTAGC  
ACCACCAAGAAGTACTGCCTCAAGTTCGGCCAAGTATGACCAAGCACAGTTCGGCAGGGGTAGGGGCTGGCAGCCCTTCC  
ACAAGTAGACTTCAGAGAATCACTGCAAGAGCCTGAAGTGTGCCATTACGCGTGGCAATAAAAAGCACGTTTAAAGCAAC  
CTGGACTGGCTAAGACAGTCTTGGCACTTCTGAAGCTCACAACATTCTGTGAGGACAGTTGGACCTACACCCAAAGT  
ACTCTTGACCCATCTCCTTAAAGTCAATAAACATAGCATGTTAACTGTGAGAGAGTCTGAGGTGTCAATCCAGGGCATCA  
GGGATGGACAGCCAGGAGCTGGCTACCCTGCAGGGGGGGGTGAGGTGTGTGGGGGGGAGTT

## Supplementary File 2. ES sequencing results

### 1. M0928.3699-2\_5R\_C11-NEO\_R\_A03

TGAATACTCTCAAGACGCGAGCTGCGGGGCGGGGGGACTTCCTGACTAGGGGAGGAGTAGAAGGTGGCGCGAAGGGGCC  
ACCAAAGAACGGAGCCGGTTGGCGCTACCGGTGGATGTGGAATGTGTGCGAGGCCAGAGGCCACTTGTGTAGCGCCAAG  
TGCCAGCGGGGCTGCTAAAGCGCATGCTCCAGACTGCCTTGGGAAAAGCGCCTCCCCTACCCGGTAGAATTCGACGAC  
CTGCAGCCAAGCTAGCTTGGCTGGACGTAAACTCCTCTTCAGACCTGAAGTTCCTATACTTCTAGAGAATAGGAACTTC  
GGAATTCTGCTGTTTGGGTGCTTTGATGGGAGACCTTCTGGACTTGTCTATCAATAAAGGAACTGTGGGGGCTCACAGA  
CTCTGTGCTGGGAAAAGTCAGCCAATCCCGACTTTCTTTGTTGTGTGACCTCAGTGGGATCCTCTCCTAGTGGATGTC  
TGTTCTCTGCTTAAACGAGGCAGATCGGGTTAGATGATCTCTAGTATTCTTCCCACCTCCAGAGTAACCTCATGTCTA  
TAGATAAGTGTGAGGAGGAAGGTGATGGGAGAGCTGAGCGGGGAGAGCAAGAGAGAATGAAGAATGGGTACCTGTCATT  
GGATTCCGTGGGGTCCAGGGATACCAAGGAGTGCCGTGCTTCCATCTCCCTGCAAACAACACAGAGCTCTCAGGCTTTC  
TATTCAAGAGCCTAATCTCATCACCGTGCAGTTCTCCTGGGTAAGAGGGTGTGCTCTAGTCTTGCCAGTGTCTCACCTGA  
TTCTTTGGGGGTGAGGACCGGGAGTCTCAGTAAAGACTGGCCAGGTGTTGTGCCTCTGAGGGGTAAAGTATGTGGAAT  
CTGAGGAGTGCCAGCCACCGCGTCAAAGATGCTCTGCTGGTGTGGCAGGCCAACTGATGTGCTCTGTGCTTGTCTC  
ACGACATTTTCAAGGAACTGGTCCGGAGGGTTCTCAAATGCAGCGGTCCAGCATTTATAACCATTGGTTTCTTCGGG  
CAAT

### 2. M0928.3700-2\_5R\_C11-RIP3\_C1R\_B03

CGAAAATCGGATCTGATCTGATCCTGACCCTGACTGGGACCCTCCCTGAAACGTGGACAGGCCAAAATCTGCTAGCTGTA  
AAGGAAAGGAAAGGGAAGGTATTAGATGAAGGGGGGGTCCAGAGATTTTCCCTCTTGTCTCCCAGAAGATGCAGCAG  
CCTCAGCTTTTTGGAAGTGTATTGAGGACCAGAGGGAAGGTAAAGTCATTGAGAACTTAGCAGGAGATCTGAGTTGCT  
GATGGGCAGGCCTGAGATAAGTCAGCCGATCCCCTCGAGGGACCTAATAACTTCGTATAGCATACTATACGAAGTTA  
TATTAAGGGTTATTGAATATGATCGGAATTGGGCTGCAGGAATTCGTGACTGGGTCCGTGAGGGTGCATTAGGCCTGTG  
GAACTGAGCCAGGGGTTAAGAAGGGCGTCTGGTAAGGAGGGTCACTGGTATGACTAGAAATAAACTCCTAGTTGGGT  
CTTGTCATGTGTAGTCTTGTATTACAGAGGGACAGGTACTCAACATGGTCCCAAGTCTACACTAGGTTGTAGATGGACT  
AACCTTGGCGTGGAGCTCTGGATCCAGCAGAATGTTAGAGGGCTTGAGGTCCCGGTGCAGGAGCGGAGGGTTCAAGCTGT  
GTAGGTAGCACATCCCAGCACCCTTCTGCAGCAGGCAGAGAGGAGTGGCCAGGGCCGAGGGCACTCGGGTTGCAGC  
AGCCCTGCGAGGGAGCCATTCTCCATGAATCTTGTACCAGAGCCTGCCCGACACGAAGTCCCCTGAGGTCCTCAGT  
GACCCCGAGCAGGAGCAGAACGTTCTCATTACGAAGATTAACCATAGCCTTACCTCCCAGGATATCTTCTTCTACAG  
CCGAAAGGGGGCCAAAATTGGATTGCGCTCTGGAAGACCCACCCTTGCCTCAGCTCGTACCACACTGACTAC  
AGCTGGGGTCACTCACGAGTTCACGATCTTACTGCTACATCATGTTCCATGTTCTGTGGTGTGCCCCGAACACGACTC  
CGAACCTCCTTACCACAACTCCAGCTTCTCAGTCTTACGGCTCACCAGAGGAACCGCCTGACGCCCCAGTAGC  
CTGAAGAAAGTTCTTGCCGTAGGGGCCATCCCCAGCCTACGCATTCTCTGTCTCCAGCTCCGGATTCTTGACTGC  
CGCGTGGCCAGCGTAGGCAGCGAG

### 3. M0928.3701-2\_5R\_H11-5RIP\_111\_C03

TGGGTCTTATTGGTGAAGTTCAGGACAGCCAGGCTACACAGAGAAACCTGTCTCGGGGAAAAAAAAAAGAAAGAAAG  
ATTTAGGAACTCTGAAGTGCAGCAAGGAAAGCATGTTTTCCAGCACACTCAACCCAAATAACTGAGCATCCTCCAAAC  
CCTCGCTGATGAAAGGGGTGACTCTTTTTCCAAACAGCATCTGCTGTGAGCACTTCTACCTCCGAAAAAAAAACTAAAG  
CTGGGACTCAAATAACTTCTGTACAATAATGTTACAGCACTGTCATTACAATGTTTAAAGGAAAAAAAAACCAACCAATG  
CCCAGGATGGATGAATGGGCATAAAGGTGTGGTATGCACTGTGCTAAAATATTTTACGATTTTATGGATATTATTAACC  
TTAATAAAATCAAACATCCATAACATAATTACCTCGAAAATGTTGTGTCTGAATCCAAATGAATTAACCAAGTCA  
AATAAAATAGCATATGTTCTTCTCCTCCTCCTCCTCTTTTTTTTTTTTTGAAACAGGGTTTCTCTATGTAGC  
CCTGTCCGTAACAGGCTGGTCTAACTCTGCCTCCAAAGTATTGGAATTAATGGTGTCTCTTTTATAAGGCATCTGA  
AGTGTTCGTGAGTGAAGTTGGGGAGTAGGAATGAGGTGGGAATGGTGTCTTACTGGGCCTGGGAAGAAGGAATGGGGAG  
TAACTATGAAATGCTCCAGAGTGTACCTTGAAGTTGGATCTTCTACTAAGGACTGAATGCTAGGGCTGACTATCCAG  
TTATTTCTACCTCCAGCCACAACATATGCCCTGAGTGATAA

## Effect of RIPK3 gene knockout on hematopoiesis in mice

### 4. M0928.3714-2\_3R\_C11-3RIP\_212\_H04

CGCCACATCATCTTGAGGAGGCAATGATTACCCTGAGCCTCTATAAAGAAGGTGCTAAGAAGCTGCTCTTTCTGAGCT  
GCTGTCCCTTTCTGCCTCTTAGGTCCTACTGACCTGGTGCTTTTTCTCAGTGTCCAGCCTCCGGCGTGAGTGCATAGAGC  
TAAGAGCCTCCCGGAACGTGGCCCGCAATGCTCGCTCCATCAGGGCCTTGTGGTACCCTCCACCACGTTCCACACAGG  
ACAATACCGCGTTTGTGCTGCAACTGTGGGCAAAGGCCAGACTTAAAAAGTGTACTACTCCCCTATCTACTCTGTGGG  
GGAGTCTATCTGTGTAGCTGGAGTTGGTTGCAAACACAGGTCGAGGAGAGCTGGCTCTATGGTTAAGGACCTAGGTATCT  
CAGAACAATAGGAGCCACTTTGTGACATCCATCCGGAAGAGTTGGTTGCTTTCCTTCTCTGCTCTCTGCTATAGACTCTT  
TCTTGGCTGTGGAACCACTGACCCTTAGGCTAGCTATCTGCATGTATATTCCTCTGTCTACAGTGTATTCTTC  
CATATTCATCTCCTGAGCCATTCCAGCTGCAAGAACTACTCCAGTTCTGATTACGTTTTCCACTAATGCTCCTCGGT  
TACTTCTGTACCCGCGAGAGAATCTTGACTGATTTCCCAATGGCTATAGTGCCCTTCTGACAAAGGTAGGCATGATG  
CACTGATGTACCAACGACACTAGAGGTCGCTATAGGGGTGTATCAATGCTTGGCTCCTGCGAGGGCCGAGCCATGTCTT  
GGATAATGCTCACAGCATTACTAAACAGCTGACCCAGCTCTGGGCACACTATCGACACCACTTGCATTTTTACCTGTGGT  
AGCAGAGCTCTCTGTGACTCAAGCTGCCACCAAGATACAGTCCAAGGACCAGCACGTGCGAGAGGGATGAGATGACTCC  
CGCAGCAGCAGCATCCCGCATGCCAAGGCGAGCATGGCGTACACGGTGAAGATGATGAAGAGGAAAAAAGACACCTGGA  
GAAGGGTGTGGGAAGCTGAATGCCCGTATGTTGCCGCCAGGGTCTAAATTTGAAGTTCAACTTCCCTCAAGCCTTGAT  
TTTCTCACCTGGATCCAAGGCGCTCACACACCCCCAGTGCACAAGAAAATTCATAGGCCAAAGGCGGTAATGCCAC  
CCGATATTGC

### 5. M0928.3715-2\_3R\_C11-NEO\_L\_A05

TACAATTCGCTGGGGGGTGGGGAGGAAGCAGGGGGAGGATTGGGAAGACAATAGCAGGCATGCTGGGGATGCGGTGG  
GCTCTATGGCTTCTGAGGCGGAAAGAACCAGCTGGGGCTCGACTAGAGCTTGCGGAACCCTTCGAAGTTCTATTCTCTA  
GAAAGTATAGGAACCTCATCAGTCAGGTACATAATAACTTCGTATAATGTATGCTATACGAAGTTATTAGGTGGATCC  
CCCTCCACAGACTAAGACATCCCTAATGGAATGGGCTCAGGAGATGAATGGCACTACTCTTTGAGCTTCTACAAGACTAA  
TTCTGAAGAGGCACAGCTCATACTGGGACGCAGTAGCTAGCAGGTGAAGACCCTGCATTTGCATTCCCCAGGGAGATCAC  
AAGGTGTCGCTGCCCTTTCCCCAAAGTGCTTGTCAACTTCATCTTTCTAACCTCTGAACCCTCTCACCATCACCTCCTC  
CTTCTCTTAAAGGGCCACCGGCTCTCGTCTTCAACAACCTGTTCTGAAGTGCAGATTGGGAACTACAACCTCTTGGTAG  
CACCACCAAGAATACTGCCTCAAGTTCGGCCAAGTATGACCAAGCACAGTTCGGCAGGGGTAGGGGCTGGCAGCCCTTC  
CACAAGTAGACTTCAGAGAATCACTGCAAGAGCCTGAAGTGTGCCATTCAGCGTGGCAATAAAAAGCACGTTTTAAGCAA  
CCTGGACTGGCTAAGACAGTCTTGCCACTTCCTGAAGCTCACAACATTCTGTGAGGACAGTTGGACCTACACCCAACT  
GACTCTTGACCCATCTCCTTAAAGTCAATAAACATAGCATGTTAACTGTGAGAGAGTCTGAGGTGTCAATCCAGGGC  
ATCAGGGATGGACAGCCAGGAGCTGGCTACCCTGGAGGGGGGGGGTGGAGGTGTGTGTGGGGGA



## Effect of RIPK3 gene knockout on hematopoiesis in mice

### Results of no. 2:

```

Query 15603 AGTCAAGA-TCGTGAACTCGTGAGTGACCCC-AGCTGT-AGTCAG-AGTGTGGTCACGAG 15658
          |||
Sbjct 1011 AGTCAAGATTTCG-GAATTCGTGAATAACCCCCAGCTGTAATTCAGAAGTGTGGTCACAAC 953

Query 15659 CCTGAGTGGGGCAA-GGGTG-GGGTCTTCCAGAGCGCAATCCAATTTTGGC-C-CCCTTT 15714
          |||
Sbjct 952 CCTGAATGGGGCAAAGGGTGAAGGTCTTCCAAAAGGCAAACCAATTTTGGCACACCCTTT 893

Query 15715 CGGCGTGTA-GGAAGAAGATATCCT-GGGAGGTGAAGGCTATGGTTAATCTTCGTAATGA 15772
          |||
Sbjct 892 CGGTGTGTAAGGAAGAAGATATCCTTGGGAAGATGAAGACTATGGTTAATCTTAGTAAAGA 833

Query 15773 GAA-CGTTCTGCTCCTG-CTGGGGGTCACTGAGGACCTCCAGTGGGACTTCGTGTCC-GG 15829
          |||
Sbjct 832 GAAACATTTTGTACTGTTGGGGGTCAATGAGGACCTCCAGAGAAATTTTCGTATCCAGA 773

Query 15830 GCA-GGCTCTGGTGACAAGATTCATGGAGAATGGCTCCCTCGCAGGGCTGCTGCAACCCG 15888
          |||
Sbjct 772 GCAGGGATCTGGTGACAAGATTCAGGAGAATGGTTCCTCGCAAGGCTGATGCAACCCG 713

Query 15889 AGTGCCCTCGGCCCTGGCCACTCCTCTGTGCGCTGCTGCAGGAAGTGGTGTGGGGATGT 15948
          |||
Sbjct 712 AGTGCCATCGGCCCTGGCCACTCTTATGTGCGTTGCTGCAGGAAGTGGTGTGGGGATGT 653

Query 15949 GCTACCTACACAGCTTGAACCCTCCGCTCCTGCACCGGGACCTCAAGCCCTCTAACATTC 16008
          |||
Sbjct 652 GCTACCTACACAGCTTGAACCCTCCGCTCCTGCACCGGGACCTCAAGCCCTCTAACATTA 593

Query 16009 TGCTGGATCCAGAGCTCCACGCCAAGGTTAGTCCATCTACAACCTAGTGTAGACTTGGGA 16068
          |||
Sbjct 592 TGCTGGATCCAGAGCTCCACGCCAAGGTTAGTCCATCTACAACCTAGTGTAGACTTGGGA 533

Query 16069 CCAATGTTGAGTACCTGTCCCTCTGAATACAAGACTACACACATGACAAGACCCAACTAGG 16128
          |||
Sbjct 532 CCAATGTTGAGTACCTGTCCCTCTGAATACAAGACTACACACATGACAAGACCCAACTAGG 473

Query 16129 AGTTTTATTTCTAGTCATACCAGGTGACCCTCCTTACCAGACGCCCTTCTTAACCCCCTG 16188
          |||
Sbjct 472 AGTTTTATTTCTAGTCATACCAGGTGACCCTCCTTACCAGACGCCCTTCTTAACCCCCTG 413

Query 16189 GCTCAGTTCCACAGGCCTAATGCACCCTCACGGACCCAGTCGACGAATTCCTGCAGCCCA 16248
          |||
Sbjct 412 GCTCAGTTCCACAGGCCTAATGCACCCTCACGGACCCAGTCGACGAATTCCTGCAGCCCA 353

Query 16249 ATTCGGATCATATTCAATAACCCCTTAATATAACTTCGTATAATGTATGCTATACGAAGTT 16308
          |||
Sbjct 352 ATTCGGATCATATTCAATAACCCCTTAATATAACTTCGTATAATGTATGCTATACGAAGTA 293

Query 16309 ATTAGGT 16315
          |||
Sbjct 292 ATTAGGT 286
    
```

Query is the Target sequence (RIPK3 cko recombined genomic DNA sequence), Subject is the result of sequencing.

## Effect of RIPK3 gene knockout on hematopoiesis in mice

### Results of no. 3:

```

Query 17755 TTCCTGGAAAATGTCCTGAGAGGCAAGCACAGGACACATCAGTTGGGCCTGCCACACCAG 17814
          |||
Sbjct 779   TTCCTGGAAAATGTCCTGAGAGGCAAGCACAGGACACATCAGTTGGGCCTGCCACACCAG 720

Query 17815 CAAGG-ACATCTTCTGACCCCGTGGCTGGCACTCCTCAGATTCCACATACTTTACCCTTC 17873
          |||
Sbjct 719   CAAGGGACATCTTCTGACCCCGTGGCTGGCACTCCTCAGATTCCACATACTTTACCCTTC 660

Query 17874 AGAGGCACAACACCTGGGCCAGTCTTTACTGAGACTCCCAGTCCCTCACCCCAAAGGAAT 17933
          |||
Sbjct 659   AGAGGCACAACACCTGGGCCAGTCTTTACTGAGACTCCCAGTCCCTCACCCCAAAGGAAT 600

Query 17934 CAGGTGAGACACTGGCAAGACTAGAGCACACCCTCTTACCCAGGAGAACTGCACGGTGAT 17993
          |||
Sbjct 599   CAGGTGAGACACTGGCAAGACTAGAGCACACCCTCTTACCCAGGAGAACTGCACGGTGAT 540

Query 17994 GAGATTAGGCTCTTGAATAGAAAGCCTGAGAGCTCTGTGTTGTTTGAGGGGAGATGGAAG 18053
          |||
Sbjct 539   GAGATTAGGCTCTTGAATAGAAAGCCTGAGAGCTCTGTGTTGTTTGAGGGGAGATGGAAG 480

Query 18054 ACACGGCACTCCTTGGTATCCCTGGACCCACCGAATCCAATGACAGGTACCCATTCTTC 18113
          |||
Sbjct 479   ACACGGCACTCCTTGGTATCCCTGGACCCACCGAATCCAATGACAGGTACCCATTCTTC 420

Query 18114 ATTCTCTCTTGCTCTCCCCGCTCAGCTCTCCCATCACCTTCCTCCTCAGCACTTATCTAT 18173
          |||
Sbjct 419   ATTCTCTCTTGCTCTCCCCGCTCAGCTCTCCCATCACCTTCCTCCTCAGCACTTATCTAT 360

Query 18174 AGACATGAGTACTCTGGAGGTGGGAAGGAATGACTAGAGATCATCTAACCCGATCTGCC 18233
          |||
Sbjct 359   AGACATGAGTACTCTGGAGGTGGGAAGGAATGACTAGAGATCATCTAACCCGATCTGCC 300

Query 18234 TCGTTTAAGACGAGGAACATGACATCCACTAGGAGAGGATCCCCTGAGGTACACAACG 18293
          |||
Sbjct 299   TCGTTTAAGACGAGGAACATGACATCCACTAGGAGAGGATCCCCTGAGGTACACAACG 240

Query 18294 AAAGAAAGTCGGGATTGGCTGACTTTTCCAGCACAGAGTCTGTGAGCCCCACAGTTCC 18353
          |||
Sbjct 239   AAAGAAAGTCGGGATTGGCTGACTTTTCCAGCACAGAGTCTGTGAGCCCCACAGTTCC 180

Query 18354 TTTATTGATAAGCAAGTCCAGAAGGTCTCCCATCAAAGACACCCAAACAGCAGAATTCCG 18413
          |||
Sbjct 179   TTTATTGATAAGCAAGTCCAGAAGGTCTCCCATCAAAGACACCCAAACAGCAGAATTCCG 120

Query 18414 AAGTTCTATTCTCTAGAAAGTATAGGAACTTCATCAGTCAGGTACATAATATAACTTCG 18473
          |||
Sbjct 119   AAGTTCTATTCTCTAGAAAGTATAGGAACTTCATCAGTCAGGTACATAATATAACTTCG 60

Query 18474 TATAATGTATGCTATACGAAGTTATTAGGTGGATCCCCCTCCACAGACTAAGACATC 18530
          |||
Sbjct 59   TATAATGTATGCTATACGAAGTTATTAGGTGG-TCCCCCTCCACAGATTATGTCATC 4
    
```

Query is the Target sequence (RIPK3 cko recombined genomic DNA sequence), Subject is the result of sequencing.

## Effect of RIPK3 gene knockout on hematopoiesis in mice

### Results of no. 4:

| Range 1: 1 to 674 <a href="#">Graphics</a> |        |                                                                |           |           | ▼ Next Match ▲ Previous Match |
|--------------------------------------------|--------|----------------------------------------------------------------|-----------|-----------|-------------------------------|
| Score                                      | Expect | Identities                                                     | Gaps      | Strand    |                               |
| 1210 bits(655)                             | 0.0    | 670/676(99%)                                                   | 5/676(0%) | Plus/Plus |                               |
| Query                                      | 18542  | GGGCTCAG-GAGATGA-ATGGCACTACTCTTTGAGCTTCTACAAGACTAATTCTGAAGAG   |           |           | 18599                         |
| Sbjct                                      | 1      | GGG-TCAGCTAGA-GAGATGGCACTACTCTTTGAGCTTCTACAAGACTAATTCTGAAGAG   |           |           | 58                            |
| Query                                      | 18600  | GCACAGCTCATACTGGGACGCAGTAGCTAGCAGGTGAAGACCCTGCATTTGCATTCCCCA   |           |           | 18659                         |
| Sbjct                                      | 59     | GCACAGCTCATACTGGGACGCAGTAGCTAGCAGGTGAAGACCCTGCATTTGCATTCCCCA   |           |           | 118                           |
| Query                                      | 18660  | GGGAGATCACAAAGGTGTCGCTGCCCTTTCCCCAAAGTGCTTGTCAACTTCATCTTTCTA   |           |           | 18719                         |
| Sbjct                                      | 119    | GGGAGATCACAAAGGTGTCGCTGCCCTTTCCCCAAAGTGCTTGTCAACTTCATCTTTCTA   |           |           | 178                           |
| Query                                      | 18720  | ACCTCTGAACCCCTCTCACCATCACCTCCTCCTTTTCTCTTAAAGGGCCACCGGCTCTCGT  |           |           | 18779                         |
| Sbjct                                      | 179    | ACCTCTGAACCCCTCTCACCATCACCTCCTCCTTTTCTCTTAAAGGGCCACCGGCTCTCGT  |           |           | 238                           |
| Query                                      | 18780  | CTTCAACAACCTGTTCTGAAGTGCAGATTGGGAACTACAACCTCCTTGGTAGCACCACCAAG |           |           | 18839                         |
| Sbjct                                      | 239    | CTTCAACAACCTGTTCTGAAGTGCAGATTGGGAACTACAACCTCCTTGGTAGCACCACCAAG |           |           | 298                           |
| Query                                      | 18840  | AACTACTGCCTCAAGTTCGGCCAAGTATGACCAAGCACAGTTCGGCAGGGGTAGGGGCTG   |           |           | 18899                         |
| Sbjct                                      | 299    | AACTACTGCCTCAAGTTCGGCCAAGTATGACCAAGCACAGTTCGGCAGGGGTAGGGGCTG   |           |           | 358                           |
| Query                                      | 18900  | GCAGCCCTTCCACAAGTAGACTTCAGAGAATCACTGCAAGAGCCTGAAGTGTGCCATTCA   |           |           | 18959                         |
| Sbjct                                      | 359    | GCAGCCCTTCCACAAGTAGACTTCAGAGAATCACTGCAAGAGCCTGAAGTGTGCCATTCA   |           |           | 418                           |
| Query                                      | 18960  | GCGTGGCAATAAAAAGCACGTTTTAAGCAACCTGGACTGGCTAAGACAGTCCTTGCCACT   |           |           | 19019                         |
| Sbjct                                      | 419    | GCGTGGCAATAAAAAGCACGTTTTAAGCAACCTGGACTGGCTAAGACAGTCCTTGCCACT   |           |           | 478                           |
| Query                                      | 19020  | TCCTGAAGCTCACAACTTCTGTGAGGACAGTTGGACCTACACCCAAACTGACTCTTGAC    |           |           | 19079                         |
| Sbjct                                      | 479    | TCCTGAAGCTCACAACTTCTGTGAGGACAGTTGGACCTACACCCAAACTGACTCTTGAC    |           |           | 538                           |
| Query                                      | 19080  | CCATCTCCTTAAAGTCAATAAACATAGCATGTTAACTGTGAGAGAGTCTGAGGTGTCAAT   |           |           | 19139                         |
| Sbjct                                      | 539    | CCATCTCCTTAAAGTCAATAAACATAGCATGTTAACTGTGAGAGAGTCTGAGGTGTCAAT   |           |           | 598                           |
| Query                                      | 19140  | CCAGGGCATCAGGGATGGACAGCCAGGAGCTGGCTACCCTGGAggggggggggTGAGGTGT  |           |           | 19199                         |
| Sbjct                                      | 599    | CCAGGGCATCAGGGATGGACAGCCAGGAGCTGGCTACCCTGGAGGGGGGGGGTGAGGTGT   |           |           | 658                           |
| Query                                      | 19200  | GTGTGGGGGG-AGTTG 19214                                         |           |           |                               |
| Sbjct                                      | 659    | GTGTGGGGGGGAGTTG 674                                           |           |           |                               |

Query is the Target sequence (RIPK3 cko recombinated genomic DNA sequence), Subject is the result of sequencing.

## Effect of RIPK3 gene knockout on hematopoiesis in mice

### Results of no. 5:

```

Query 22673 CGCTGCTACATCAGTGCACCATGCCTACCTTTGTCTCAGAAGAGGGCACTATAGCCATTGGG 22732
          |||
Sbjct 739 CGCTGCTACATCAGTGCACCATGCCTACCTTTGTCTCAGAAGAGGGCACTATAGCCATTGGG 680

Query 22733 AAATCAGTCAAGATTCTCTCGCGGGTACAGAAGTAAACCGAGGAGCATTCTGTGAAAAACG 22792
          |||
Sbjct 679 AAATCAGTCAAGATTCTCTCGCGGGTACAGAAGTAAACCGAGGAGCATTCTGTGAAAAACG 620

Query 22793 TGAATCAGAACTGGAGTAGTTTCTTGACAGCTGGAATGGGCTCAGGAGATGAATATGGAAG 22852
          |||
Sbjct 619 TGAATCAGAACTGGAGTAGTTTCTTGACAGCTGGAATGGGCTCAGGAGATGAATATGGAAG 560

Query 22853 AATAGCACTCTAGACAGAGGAAATATACATGCAAGATAGCTAGGCCTAAGCGGTCAGGTT 22912
          |||
Sbjct 559 AATAGCACTCTAGACAGAGGAAATATACATGCAAGATAGCTAGGCCTAAGCGGTCAGGTT 500

Query 22913 GGTTCACAGCCAAGAAAGAGTCTATAGCAGAGAGCAGAGAAGGAAAGCAACCAACTCTT 22972
          |||
Sbjct 499 GGTTCACAGCCAAGAAAGAGTCTATAGCAGAGAGCAGAGAAGGAAAGCAACCAACTCTT 440

Query 22973 CCGGATGGATGTCACAAAGTGGCTCCTATTGTTCTGAGATACCTAGGTCCTTAACCATAG 23032
          |||
Sbjct 439 CCGGATGGATGTCACAAAGTGGCTCCTATTGTTCTGAGATACCTAGGTCCTTAACCATAG 380

Query 23033 AGCCAGCTCTCCTCGACCTGTGTTTGAACCAACTCCAGCTACACAGATAGACTCCCCCA 23092
          |||
Sbjct 379 AGCCAGCTCTCCTCGACCTGTGTTTGAACCAACTCCAGCTACACAGATAGACTCCCCCA 320

Query 23093 CAGACTAGAGATAGGGGAGTGGTACACTTTCTAAGTCTGGCCTTTGCCACAGTTGGCAG 23152
          |||
Sbjct 319 CAGACTAGAGATAGGGGAGTGGTACACTTTCTAAGTCTGGCCTTTGCCACAGTTGGCAG 260

Query 23153 CAAACGCGGTATTGTTCCCTGTGTGGGAACGTGGTGGGAGCGTACCACAAGGCCCTGATGG 23212
          |||
Sbjct 259 CAAACGCGGTATTGTTCCCTGTGTGGGAACGTGGTGGGAGCGTACCACAAGGCCCTGATGG 200

Query 23213 AGCGAGCATTGCGGGCCACGTTCCGGGAGGCTCTTAGCTCTCTGCACTCACGCCGGAGGC 23272
          |||
Sbjct 199 AGCGAGCATTGCGGGCCACGTTCCGGGAGGCTCTTAGCTCTCTGCACTCACGCCGGAGGC 140

Query 23273 TGGACACTGAGAAAAAGCACCAGGTCAGTAGGACCTAAGAGGCAGAAAGGGACAGCAGCT 23332
          |||
Sbjct 139 TGGACACTGAGAAAAAGCACCAGGTCAGTAGGACCTAAGAGGCAGAAAGGGACAGCAGCT 80

Query 23333 CAGAAAGAGCAGCTTCTTAGCACCTTCTTTCTAAGTGGCTCTGGGTAATTCATTTGCCTT 23392
          |||
Sbjct 79 CAGAAAGAGCAGCTTCTTAGCACCTTCTTTCTAAGTGGCTCTGGGTAATTCATT-GCCT- 22

Query 23393 CCTCAAGTAT 23402
          |||
Sbjct 21 CCTCAAGTAT 12
    
```

Query is the Target sequence (RIPK3 cko recombined genomic DNA sequence), Subject is the result of sequencing.
